CORRESPONDENCE

---

**References**

1. Loubser PG, Clearman RR: Evaluation of central spinal cord pain with diagnostic spinal anesthesia. *ANESTHESIOLOGY* 79:376-378, 1993
2. Beric A, Dimitrijevic MR, Light JK: A clinical syndrome of rostral and caudal spinal injury: Neurological, neurophysiological and uro-

dynamic evidence for occult sacral lesion. *J Neurol Neurosurg Psychiatry* 50:600-606, 1987

3. Beric A, Dimitrijevic MR, Lindblom U: Central dysesthesia syndrome in spinal cord patients. *Pain* 36:109-116, 1988

*(Accepted for publication September 20, 1994.)*

**ANNOUNCEMENT**

The American Board of Anesthesiology will administer a written examination in CRITICAL CARE MEDICINE on Friday, September 8, 1995. Diplomates of the ABA who apply and are judged to be qualified by virtue of their additional training in the subspecialty will be accepted for examination. An application may be requested by writing to the Secretary, American Board of Anesthesiology, 100 Constitution Plaza, Hartford, Connecticut 06103-1796. The deadline for receipt of completed applications in the Board office is March 1, 1995.
